# Supplementary material for: Allogeneic stem cell transplantation in second complete remission for core binding factor acute myeloid leukemia: a study from the Acute Leukemia Working Party of the European Society for Blood and Marrow Transplantation
Source: PubMed Central journal article supplement — Haematologica. 2019 Aug 22;105(6):1723–30. doi: 10.3324/haematol.2019.222810 (PMC7271580; doi:10.3324/haematol.2019.222810), 2020-06
Supplement: 2019.222810.HALABURDA_SUPPL.pdf [file 2019.222810.HALABURDA_SUPPL.pdf]

# Allogeneic stem cell transplantation in second complete remission for core binding factor acute myeloid leukemia: a study from the Acute Leukemia Working Party of the European Society for Blood and Marrow Transplantation

Kazimierz Halaburda,<sup>1\*</sup> Myriam Labopin,<sup>2,3\*</sup> Audrey Mailhol,<sup>2</sup> Gerard Socié,<sup>4</sup> Charles Craddock,<sup>5</sup> Mahmoud Aljurf,<sup>6</sup> Dietrich Beelen,<sup>7</sup> Jan J. Cornelissen,<sup>8</sup> Jean-Henri Bourhis,<sup>9</sup> H  l  ne Labussiere-Wallet,<sup>10</sup> Didier Blaise,<sup>11</sup> Tobias Gedde-Dahl,<sup>12</sup> Maria Gilleece,<sup>13</sup> Ibrahim Yakoub-Agha,<sup>14</sup> Ghulam Mufti,<sup>15</sup> Jordi Esteve,<sup>16</sup> Mohamad Mohty<sup>2,3</sup> and Arnon Nagler<sup>2,17\*</sup>

<sup>1</sup>Institute of Haematology and Transfusion Medicine, Warsaw, Poland; <sup>2</sup>EBMT Paris Study Office, Paris, France; <sup>3</sup>Saint Antoine Hospital, Paris, France; <sup>4</sup>St. Louis Hospital, Paris, France; <sup>5</sup>Queen Elizabeth Hospital, Birmingham, UK; <sup>6</sup>King Faisal Hospital, Riyadh, Saudi Arabia; <sup>7</sup>University Hospital, Essen, Germany; <sup>8</sup>Erasmus MC Cancer Institute, Rotterdam, the Netherlands; <sup>9</sup>Gustave Roussy Institut de Canc  rologie, Villejuif, France; <sup>10</sup>Hospices Civils de Lyon, Centre Hospitalier Lyon Sud, Lyon, France; <sup>11</sup>Institut Paoli Calmettes, Marseille, France; <sup>12</sup>Oslo University Hospital, Oslo, Norway; <sup>13</sup>St James's Institute of Oncology, Leeds, UK; <sup>14</sup>CHU de Lille, LIRIC, INSERM U995, Universit   de Lille, 59000 Lille, France; <sup>15</sup>GKT School of Medicine, London, UK; <sup>16</sup>Hospital Clinic, Barcelona, Spain and <sup>17</sup>Chaim Sheba Medical Center, Tel Hashomer, Israel

\*KH, ML and AN contributed equally as co-first authors.

  2020 Ferrata Storti Foundation. This is an open-access paper. doi:10.3324/haematol.2019.222810

Received: March 22, 2019.

Accepted: August 14, 2019.

Pre-published: August 22, 2019.

Correspondence: KAZIMIERZ HALABURDA - khalab30@wp.pl

Supplemental Table 1. Comparison of patient and transplant characteristics of inv(16) and t(8;21) AML groups.

|                                            |                                 | <b>inv(16)</b>                        | <b>t(8;21)</b>                        | <b>p-value</b> |
|--------------------------------------------|---------------------------------|---------------------------------------|---------------------------------------|----------------|
| N                                          |                                 | 366                                   | 265                                   |                |
| Age at transplantation (years)             | median (range)[IQR]             | 41.9 ( 18.1-73.9 ) [ 30.9-50.9 ]      | 41.5 ( 18-73.3 ) [ 31.6-51.2 ]        | 0.92           |
| Year of transplantation                    | median (range)[IQR]             | 2010 ( 2000-2014 ) [ 2007-2012 ]      | 2009 ( 2000-2014 ) [ 2006-2012 ]      | 0.49           |
| Time from diagnosis to CR1 (days)          | median (range)[IQR]<br>missing  | 38 ( 10-275 ) [ 30-49.8 ]<br>100      | 43 ( 10-162 ) [ 31-59.2 ]<br>97       | 0.043          |
| CR1 duration (days)                        | median (range)[IQR]<br>missing  | 311 ( 14-2380 ) [ 244-434 ]<br>109    | 341 ( 14-2068 ) [ 249-533 ]<br>108    | 0.08           |
| Time form CR2 to transplantation (days)    | median (range)[IQR]<br>missing  | 56 ( 7-252 ) [ 28.5-100.5 ]<br>260    | 55 ( 6-234 ) [ 23-88 ]<br>212         | 0.38           |
| Time diagnosis to transplantation (months) | median (range)[IQR]<br>missing  | 16.5 ( 3.5-87.3 ) [ 13.9-21.6 ]<br>0  | 18.2 ( 3.9-222.9 ) [ 14.3-24.8 ]<br>0 | 0.005          |
| FLT3-ITD                                   | negative<br>positive<br>missing | 82 ( 85.42% )<br>14 ( 14.58% )<br>270 | 49 ( 80.33% )<br>12 ( 19.67% )<br>204 | 0.40           |
| NPM1 mutation                              | absent<br>present<br>missing    | 24 ( 85.71% )<br>4 ( 14.29% )<br>338  | 17 ( 94.44% )<br>1 ( 5.56% )<br>247   | 0.63           |

|                                           |                                                                                                                                                                  |                                                                                                                                                           |                                                                                                                                                                    |        |
|-------------------------------------------|------------------------------------------------------------------------------------------------------------------------------------------------------------------|-----------------------------------------------------------------------------------------------------------------------------------------------------------|--------------------------------------------------------------------------------------------------------------------------------------------------------------------|--------|
| ≥3 chromosomal abnormalities at diagnosis | no<br>yes                                                                                                                                                        | 347 ( 94.81% )<br>19 ( 5.19% )                                                                                                                            | 252 ( 95.09% )<br>13 ( 4.91% )                                                                                                                                     | 0.87   |
| Associated chromosomal abnormalities      | no associated abnormalities<br>t(11;23)<br>abn5<br>abn7<br>del9<br>del X or del Y<br>trisomy22<br>trisomy 8<br>hyperploidy<br>hypodiplidy<br>other abnormalities | 294 ( 80.33% )<br>2 ( 0.55% )<br>0 ( 0% )<br>8 ( 2.19% )<br>0 ( 0% )<br>0 ( 0% )<br>9 ( 2.46% )<br>9 ( 2.46% )<br>3 ( 0.82% )<br>0 ( 0% )<br>22 ( 6.01% ) | 203 ( 76.6% )<br>1 ( 0.38% )<br>2 ( 0.75% )<br>2 ( 0.75% )<br>5 ( 1.89% )<br>18 ( 6.79% )<br>0 ( 0% )<br>1 ( 0.38% )<br>1 ( 0.38% )<br>7 ( 2.64% )<br>12 ( 4.53% ) |        |
| Extramedullary disease at diagnosis       | no<br>yes<br>missing                                                                                                                                             | 131 ( 88.51% )<br>17 ( 11.49% )<br>218                                                                                                                    | 68 ( 89.47% )<br>8 ( 10.53% )<br>189                                                                                                                               | 0.83   |
| Patient sex                               | male<br>female                                                                                                                                                   | 189 ( 51.64% )<br>177 ( 48.36% )                                                                                                                          | 172 ( 64.91% )<br>93 ( 35.09% )                                                                                                                                    | 0.0009 |
| Donor sex                                 | male<br>female<br>missing                                                                                                                                        | 216 ( 59.83% )<br>145 ( 40.17% )<br>5                                                                                                                     | 153 ( 58.85% )<br>107 ( 41.15% )<br>5                                                                                                                              | 0.80   |

|                                                |                                               |                                        |                                       |      |
|------------------------------------------------|-----------------------------------------------|----------------------------------------|---------------------------------------|------|
| Sex matching                                   | female to male transplant<br>other<br>missing | 69 ( 18.9% )<br>296 ( 81.1% )<br>1     | 64 ( 24.43% )<br>198 ( 75.57% )<br>3  | 0.09 |
| Karnofsky performance score at transplantation | <80%<br>≥80%<br>missing                       | 12 ( 3.54% )<br>327 ( 96.46% )<br>27   | 4 ( 1.69% )<br>232 ( 98.31% )<br>29   | 0.18 |
| Donor                                          | matched sibling<br>unrelated                  | 154 ( 42.08% )<br>212 ( 57.92% )       | 110 ( 41.51% )<br>155 ( 58.49% )      | 0.89 |
| Graft source                                   | bone marrow<br>peripheral blood<br>missing    | 73 ( 19.95% )<br>293 ( 80.05% )<br>0   | 44 ( 16.6% )<br>221 ( 83.4% )<br>0    | 0.29 |
| Molecular MRD at transplantation               | negative<br>positive<br>missing               | 206 ( 76.58% )<br>63 ( 23.42% )<br>97  | 137 ( 68.84% )<br>62 ( 31.16% )<br>66 | 0.06 |
| Patient anti-CMV IgG at transplantation        | negative<br>positive<br>missing               | 132 ( 36.87% )<br>226 ( 63.13% )<br>8  | 95 ( 37.11% )<br>161 ( 62.89% )<br>9  | 0.95 |
| Donor anti-CMV IgG at transplantation          | negative<br>positive<br>missing               | 179 ( 50.85% )<br>173 ( 49.15% )<br>14 | 127 ( 49.03% )<br>132 ( 50.97% )<br>6 | 0.66 |
| In vivo T-cell depletion                       | no                                            | 170 ( 46.45% )                         | 132 ( 50.57% )                        | 0.31 |

|              |                   |                |                |      |
|--------------|-------------------|----------------|----------------|------|
|              | yes               | 196 ( 53.55% ) | 129 ( 49.43% ) |      |
|              | missing           | 0              | 4              |      |
| Conditioning | myeloablative     | 238 ( 65.21% ) | 186 ( 70.72% ) | 0.14 |
|              | reduced intensity | 127 ( 34.79% ) | 77 ( 29.28% )  |      |
|              | missing           | 1              | 2              |      |

AML, acute myeloid leukemia; IQR, interquartile range, CR1, first complete remission; CR2, second complete remission; FLT3-ITD, fms like tyrosine kinase 3 internal tandem duplication; NPM1, nucleophosmin; MRD, minimal residual disease; anti-CMV IgG, anti cytomegaloviorus antibody class IgG.

Supplemental Table 2. Endpoints stratified by minimal residual disease status before transplantation – univariate analysis.

|               |         | 2 year results   |                  |                  |                  |                  |
|---------------|---------|------------------|------------------|------------------|------------------|------------------|
|               |         | relapse          | NRM              | LFS              | OS               | GRFS             |
| <b>MRDneg</b> | inv(16) | 11.6%[7.6-16.5]  | 21%[15.6-26.9]   | 67.4%[60.8-73.9] | 71.8%[65.5-78.1] | 46.2%[39-53.3]   |
|               | t(8;21) | 22.5%[15.7-30]   | 23.2%[16.3-30.9] | 54.3%[45.6-63]   | 57.4%[48.7-66.1] | 38.7%[30.1-47.3] |
|               | P value | 0.037            | 0.56             | 0.031            | 0.022            | 0.22             |
| <b>MRDpos</b> | inv(16) | 23.3%[13.5-34.7] | 22.9%[13.3-34.2] | 53.8%[41.2-66.4] | 67.1%[55.3-79]   | 30%[18.2-41.9]   |
|               | t(8;21) | 36%[23.5-48.7]   | 19.9%[10.5-31.4] | 43.4%[30.2-56.7] | 51.6%[38.2-65.1] | 28.2%[16.4-40]   |
|               | P value | 0.12             | 0.66             | 0.30             | 0.08             | 0.92             |

MRDneg, minimal residual disease negative; MRDpos, minimal residual disease positive; inv(16), acute myeloid leukemia with inv(16); t(8;21), acute myeloid leukemia with t(8;21); NRM, non-relapse mortality; LFS, leukemia-free survival; OS, overall survival; GRFS, graft-versus-host disease-free, relapse-free survival.



|                                      |              |                                    |                                    |                                  |                              |                                  |                                   |                                   |
|--------------------------------------|--------------|------------------------------------|------------------------------------|----------------------------------|------------------------------|----------------------------------|-----------------------------------|-----------------------------------|
|                                      | other (n=34) | [2.5-49.6]<br>30.2%<br>[15.5-46.3] | [10.5-68.9]<br>11.9%<br>[3.7-25.3] | [9.6-70.4]<br>58%<br>[41.1-74.8] | [9.6-70.4]<br>67%<br>[51-83] | [0-44.8]<br>42.8%<br>[25.9-59.7] | [15.5-77.3]<br>45.2%<br>[26.8-62] | [6.2-59.3]<br>11.8%<br>[3.6-25.1] |
| ≥ 3 cytogenetic abnormalities        | No           | 19%<br>[15.9-22.3]                 | 20.6%<br>[17.4-24]                 | 60.4%<br>[56.3-64.4]             | 65.9%<br>[62-69.8]           | 41.3%<br>[37.2-45.4]             | 46.8%<br>[42.5-51]                | 28.4%<br>[24.8-32.1]              |
|                                      | Yes          | 34.4%<br>[18.4-51]                 | 28.1%<br>[13.8-44.4]               | 37.5%<br>[20.7-54.3]             | 49.6%<br>[32.2-67.1]         | 20%<br>[5.7-34.3]                | 44.8%<br>[25.6-62.4]              | 19.4%<br>[7.7-34.9]               |
|                                      | P value      | 0.032235                           | 0.2903                             | 0.0022938                        | 0.013                        | 0.013759                         | 0.80179                           | 0.3306                            |
| Molecular CR at transplantation      | No           | 29.3%<br>[21.2-37.8]               | 21.5%<br>[14.5-29.4]               | 49%<br>[39.8-58.2]               | 59.9%<br>[50.8-68.9]         | 29.2%<br>[20.8-37.5]             | 48.9%<br>[39.3-57.9]              | 27.2%<br>[19.6-35.4]              |
|                                      | Yes          | 16.2%<br>[12.4-20.4]               | 22.2%<br>[17.8-26.8]               | 61.6%<br>[56.3-66.9]             | 65.8%<br>[60.7-71]           | 42.9%<br>[37.4-48.4]             | 45.9%<br>[40.1-51.5]              | 29.5%<br>[24.7-34.4]              |
|                                      | P value      | 0.0028876                          | 0.49498                            | 0.046352                         | 0.4667                       | 0.014591                         | 0.61705                           | 0.71792                           |
| WBC at diagnosis,<br>median 28.9 G/l | ≤ median     | 21.9%<br>[15.9-28.5]               | 16.9%<br>[11.6-23]                 | 61%<br>[53.5-68.5]               | 67.1%<br>[59.8-74.3]         | 35.9%<br>[28.4-43.4]             | 48.3%<br>[40.2-55.9]              | 29.4%<br>[22.6-36.4]              |
|                                      | > median     | 16.5%<br>[11.4-22.5]               | 22.4%<br>[16.4-28.9]               | 61.1%<br>[53.7-68.4]             | 66.4%<br>[59.3-73.5]         | 45.2%<br>[37.6-52.7]             | 47.7%<br>[39.8-55.1]              | 30%<br>[23.3-37]                  |
|                                      | P value      | 0.41534                            | 0.16296                            | 0.64058                          | 0.97605                      | 0.24469                          | 0.89203                           | 0.84125                           |
| Patient age, median 41.7 years       | ≤ median     | 17.9%<br>[13.8-22.5]               | 21.2%<br>[16.8-26.1]               | 60.7%<br>[55.1-66.3]             | 66.5%<br>[61.1-71.9]         | 39.9%<br>[34.2-45.7]             | 48.5%<br>[42.4-54.4]              | 30%<br>[24.9-35.2]                |
|                                      | > median     | 21.7%<br>[17.2-26.5]               | 20.7%<br>[16.3-25.4]               | 57.6%<br>[52-63.2]               | 63.6%<br>[58.1-69]           | 40.4%<br>[34.8-46]               | 45%<br>[39.2-50.7]                | 25.9%<br>[21.1-31]                |
|                                      | P value      | 0.14708                            | 0.9807                             | 0.29435                          | 0.39368                      | 0.95855                          | 0.34313                           | 0.27792                           |
| Patient sex                          | Male         | 21.4%<br>[17.2-25.9]               | 20.3%<br>[16.2-24.7]               | 58.3%<br>[53-63.5]               | 65%<br>[59.9-70.1]           | 40%<br>[34.6-45.3]               | 46.5%<br>[40.9-52]                | 28.7%<br>[24.1-33.5]              |
|                                      | Female       | 17.8%<br>[13.4-22.7]               | 21.9%<br>[17.1-27.1]               | 60.3%<br>[54.3-66.2]             | 65%<br>[59.1-70.8]           | 40.4%<br>[34.3-46.5]             | 47%<br>[40.5-53.2]                | 27%<br>[21.7-32.5]                |
|                                      | P value      | 0.16887                            | 0.63076                            | 0.52692                          | 0.72766                      | 0.70516                          | 0.92355                           | 0.66892                           |



|                                                |                |                      |                      |                      |                      |                      |                      |                      |
|------------------------------------------------|----------------|----------------------|----------------------|----------------------|----------------------|----------------------|----------------------|----------------------|
| Donor sex                                      | Male           | 20.3%<br>[16.3-24.6] | 23.5%<br>[19.2-28]   | 56.2%<br>[51-61.3]   | 62.9%<br>[57.8-67.9] | 39%<br>[33.7-44.2]   | 43.4%<br>[37.9-48.7] | 29%<br>[24.4-33.8]   |
|                                                | Female         | 19.9%<br>[15-25.2]   | 17.1%<br>[12.6-22.2] | 62.9%<br>[56.7-69.1] | 67.8%<br>[61.8-73.8] | 41.3%<br>[35-47.7]   | 52.1%<br>[45.4-58.4] | 27.1%<br>[21.7-32.7] |
|                                                | P value        | 0.94983              | 0.2524               | 0.24726              | 0.49223              | 0.76808              | 0.010383             | 0.62344              |
| Donor and recipient sex matching               | Female to male | 21.9%<br>[15-29.6]   | 15.9%<br>[10.1-22.9] | 62.1%<br>[53.5-70.7] | 68.1%<br>[59.8-76.4] | 39.1%<br>[30.5-47.7] | 55.2%<br>[45.8-63.7] | 26.8%<br>[19.5-34.6] |
|                                                | Other          | 19.4%<br>[16-23.1]   | 22.5%<br>[18.8-26.3] | 58.1%<br>[53.6-62.5] | 63.9%<br>[59.6-68.3] | 40.2%<br>[35.6-44.7] | 44.5%<br>[39.8-49.1] | 28.3%<br>[24.3-32.4] |
|                                                | P value        | 0.5376               | 0.22135              | 0.51464              | 0.66644              | 0.67045              | 0.026565             | 0.6827               |
| Patient anti-CMV IgG                           | Negative       | 23.1%<br>[17.7-28.9] | 20.6%<br>[15.5-26.3] | 56.2%<br>[49.6-62.9] | 64.9%<br>[58.5-71.3] | 39.9%<br>[33.2-46.6] | 45.7%<br>[38.6-52.5] | 28%<br>[22.1-34.1]   |
|                                                | Positive       | 18%<br>[14.2-22.1]   | 21.1%<br>[17.1-25.4] | 60.9%<br>[55.9-65.9] | 65.1%<br>[60.2-70]   | 40.6%<br>[35.4-45.7] | 47%<br>[41.6-52.2]   | 28.7%<br>[24.2-33.3] |
|                                                | P value        | 0.071864             | 0.89372              | 0.22939              | 0.50705              | 0.82786              | 0.85399              | 0.9521               |
| Donor anti-CMV IgG                             | Negative       | 22.5%<br>[17.9-27.5] | 20%<br>[15.7-24.8]   | 57.4%<br>[51.7-63.2] | 65.3%<br>[59.8-70.8] | 41.8%<br>[36-47.5]   | 40.5%<br>[34.6-46.3] | 30.5%<br>[25.3-35.8] |
|                                                | Positive       | 17.7%<br>[13.6-22.3] | 21.2%<br>[16.7-26.1] | 60.9%<br>[55.3-66.6] | 65.3%<br>[59.7-70.8] | 38.4%<br>[32.7-44.2] | 53.2%<br>[47-59]     | 26%<br>[21.1-31]     |
|                                                | P value        | 0.38964              | 0.49007              | 0.95438              | 0.9656               | 0.064535             | 0.0020307            | 0.19717              |
| Karnofsky performance score at transplantation | KPS<80         | 12.5%<br>[1.8-34.2]  | 50%<br>[23.3-71.9]   | 37.5%<br>[13.8-61.2] | 37.5%<br>[13.8-61.2] | 37.5%<br>[13.8-61.2] | 21.4%<br>[4.4-46.9]  | 25%<br>[7.3-48]      |
|                                                | KPS≥80         | 20.3%<br>[17-23.8]   | 19.8%<br>[16.5-23.3] | 59.9%<br>[55.7-64.1] | 66.1%<br>[62.1-70.2] | 40.8%<br>[36.5-45.1] | 48%<br>[43.5-52.3]   | 28%<br>[24.3-31.9]   |
|                                                | P value        | 0.7175               | 0.0018721            | 0.0026102            | 0.0026872            | 0.23993              | 0.098761             | 0.82352              |
| Year of transplantation, median 2010           | ≤ median       | 19.8%<br>[15.8-24.2] | 20.9%<br>[16.7-25.3] | 59.3%<br>[54.1-64.5] | 65%<br>[60-70.1]     | 42.3%<br>[36.9-47.6] | 48.3%<br>[42.7-53.7] | 28.7%<br>[24-33.6]   |
|                                                | > median       | 19.8%<br>[15.2-24.9] | 21.3%<br>[16.5-26.5] | 58.8%<br>[52.7-64.9] | 64.9%<br>[59-70.8]   | 37.2%<br>[31.2-43.3] | 44.7%<br>[38.2-50.9] | 27%<br>[21.8-32.5]   |

|                                                                |                 |                      |                      |                      |                      |                      |                      |                      |
|----------------------------------------------------------------|-----------------|----------------------|----------------------|----------------------|----------------------|----------------------|----------------------|----------------------|
|                                                                | P value         | 0.86894              | 0.51948              | 0.7491               | 0.75484              | 0.28024              | 0.33187              | 0.45657              |
| Time from diagnosis to CR1,<br>median 39 days                  | ≤ median        | 19.1%<br>[14.1-24.6] | 22.3%<br>[17-28.1]   | 58.5%<br>[51.9-65.1] | 63.6%<br>[57.1-70]   | 37.5%<br>[30.9-44.1] | 50%<br>[42.9-56.7]   | 28.7%<br>[22.7-34.9] |
|                                                                | > median        | 20.9%<br>[15.7-26.7] | 20.4%<br>[15.2-26.1] | 58.6%<br>[51.9-65.3] | 64.8%<br>[58.3-71.2] | 42.1%<br>[35.3-48.9] | 45.5%<br>[38.4-52.3] | 27%<br>[21.2-33.2]   |
|                                                                | P value         | 0.29401              | 0.7577               | 0.56825              | 0.88722              | 0.50595              | 0.60636              | 0.74324              |
| CR1 duration,<br>median 318 days                               | ≤ median        | 26.4%<br>[20.5-32.6] | 17.1%<br>[12.3-22.5] | 56.6%<br>[49.8-63.4] | 62.4%<br>[55.8-69.1] | 37.8%<br>[31-44.6]   | 49.8%<br>[42.5-56.6] | 26.2%<br>[20.3-32.4] |
|                                                                | > median        | 13%<br>[8.8-18.1]    | 25.8%<br>[19.9-32]   | 61.2%<br>[54.4-67.9] | 66.7%<br>[60.1-73.2] | 42.3%<br>[35.3-49.2] | 47.1%<br>[39.8-54]   | 30.2%<br>[24-36.6]   |
|                                                                | P value         | 5.8795e-05           | 0.0067452            | 0.3257               | 0.453                | 0.21993              | 0.54701              | 0.37179              |
| Time from CR2 to<br>transplantation,<br>median 56 days         | ≤ median        | 16%<br>[9-24.8]      | 18.4%<br>[10.8-27.5] | 65.7%<br>[55.4-76]   | 70.6%<br>[60.7-80.5] | 45.2%<br>[34-56.4]   | 47.8%<br>[36.2-58.5] | 25.7%<br>[16.6-35.8] |
|                                                                | > median        | 26.3%<br>[17-36.6]   | 19.6%<br>[11.6-29.2] | 54.1%<br>[42.9-65.3] | 65.9%<br>[55.2-76.5] | 28.5%<br>[18.2-38.8] | 50.7%<br>[38.6-61.6] | 27.7%<br>[18.1-38.1] |
|                                                                | P value         | 0.36312              | 0.97782              | 0.41071              | 0.32318              | 0.26791              | 0.49986              | 0.79544              |
| Time from diagnosis to<br>transplantation,<br>median 17 months | ≤ median        | 26.4%<br>[21.6-31.5] | 18%<br>[13.9-22.5]   | 55.5%<br>[49.9-61.2] | 62.9%<br>[57.4-68.4] | 38.3%<br>[32.7-43.9] | 45.1%<br>[39.2-50.9] | 27.9%<br>[23-33]     |
|                                                                | > median        | 13.1%<br>[9.5-17.2]  | 24%<br>[19.3-29]     | 62.8%<br>[57.3-68.4] | 67.2%<br>[61.9-72.6] | 42.1%<br>[36.4-47.8] | 48.4%<br>[42.3-54.2] | 28%<br>[23.1-33.2]   |
|                                                                | P value         | 3.2283e-05           | 0.013632             | 0.21426              | 0.48203              | 0.28012              | 0.34122              | 0.9553               |
| Donor                                                          | Matched sibling | 20.8%<br>[16-26]     | 20.4%<br>[15.7-25.6] | 58.7%<br>[52.6-64.8] | 65.5%<br>[59.6-71.5] | 37%<br>[30.9-43.1]   | 50.9%<br>[44.3-57.2] | 24.1%<br>[19.1-29.5] |
|                                                                | Unrelated       | 19.1%<br>[15.2-23.4] | 21.3%<br>[17.2-25.7] | 59.5%<br>[54.3-64.7] | 64.7%<br>[59.6-69.7] | 42.5%<br>[37.2-47.7] | 43.7%<br>[38.2-49.1] | 30.8%<br>[26-35.6]   |
|                                                                | P value         | 0.6424               | 0.4439               | 0.89774              | 0.8574               | 0.4399               | 0.082295             | 0.048713             |
| Conditioning intensity                                         | MAC             | 17%<br>[13.5-20.9]   | 22%<br>[18.1-26.2]   | 60.9%<br>[56.2-65.7] | 66.9%<br>[62.3-71.5] | 39.9%<br>[35-44.8]   | 46.5%<br>[41.4-51.6] | 30.8%<br>[26.4-35.2] |

|                          |                  |                      |                      |                      |                      |                      |                      |                      |
|--------------------------|------------------|----------------------|----------------------|----------------------|----------------------|----------------------|----------------------|----------------------|
|                          | RIC              | 25.9%<br>[19.9-32.2] | 18.4%<br>[13.3-24.2] | 55.6%<br>[48.6-62.6] | 61.5%<br>[54.7-68.4] | 40.9%<br>[34-47.9]   | 47.4%<br>[40-54.4]   | 21.6%<br>[16.1-27.7] |
|                          | P value          | 0.0023561            | 0.28638              | 0.17549              | 0.21936              | 0.6978               | 0.8531               | 0.012579             |
| Graft source             | Bone marrow      | 18.9%<br>[12.2-26.8] | 21.9%<br>[14.8-29.9] | 59%<br>[49.9-68.2]   | 65.3%<br>[56.4-74.1] | 44.3%<br>[34.9-53.6] | 37.1%<br>[28-46.2]   | 36%<br>[27.3-44.8]   |
|                          | Peripheral blood | 20%<br>[16.6-23.7]   | 20.8%<br>[17.3-24.5] | 59.2%<br>[54.8-63.6] | 65%<br>[60.7-69.2]   | 39.2%<br>[34.8-43.7] | 49.1%<br>[44.3-53.6] | 26.1%<br>[22.3-30]   |
|                          | P value          | 0.34853              | 0.90128              | 0.62518              | 0.91932              | 0.22462              | 0.039322             | 0.037095             |
| in vivo T-cell depletion | No               | 16.7%<br>[12.7-21.3] | 22%<br>[17.4-27]     | 61.2%<br>[55.5-66.8] | 66.6%<br>[61.1-72]   | 33.9%<br>[28.3-39.5] | 55.9%<br>[49.7-61.6] | 32.7%<br>[27.4-38.1] |
|                          | Yes              | 22.6%<br>[18.1-27.4] | 20.2%<br>[15.9-24.9] | 57.1%<br>[51.5-62.6] | 63.5%<br>[58.1-68.9] | 46.1%<br>[40.5-51.8] | 37.7%<br>[32.1-43.3] | 23.6%<br>[19-28.4]   |
|                          | P value          | 0.024458             | 0.45092              | 0.24087              | 0.84598              | 0.0036315            | 3.7709e-05           | 0.014416             |

MEDC, EBMT detailed reporting form with additional patient and treatment information; RI, relapse incidence; NRM, non-relapse mortality; LFS, leukemia-free survival; OS, overall survival; GRFS, graft-versus-host disease-free, relapse-free survival ; cGVHD, chronic graft-versus-host disease; aGvHD II-IV acute graft-versus-host disease, grades II to IV; CBF AML, core-binding factor acute myeloid leukemia; abn 7, chromosome 7 abnormalities including monosomy or partial deletion;  $\geq 3$ , three or more accompanying chromosomal abnormalities; del X or Y, deletion of chromosome X or Y; trisomy 22, trisomy of chromosome 22; trisomy 8, trisomy of chromosome 8; CR complete remission; WBC, white blood cell count; anti-CMV IgG, anti cytomegalovirus antibody class IgG; CR1, first complete remission; CR2, second complete remission.
