# Supplementary material for: Allogeneic stem cell transplantation in second complete remission for core binding factor acute myeloid leukemia: a study from the Acute Leukemia Working Party of the European Society for Blood and Marrow Transplantation
Source: PubMed Central journal article supplement — Haematologica. 2019 Aug 22;105(6):1723–30. doi: 10.3324/haematol.2019.222810 (PMC7271580; doi:10.3324/haematol.2019.222810), 2020-06
Supplement: 2019_222810-Disclosures_and_Contributions.pdf [file 2019_222810-Disclosures_and_Contributions.pdf]

Haematologica  
HAEMATOL/2019/222810  
Version 3

Allogeneic stem cell transplantation in second complete remission for core binding factor acute myeloid leukemia: a study from the Acute Leukemia Working Party of the European Society for Blood and Marrow Transplantation

Kazimierz Halaburda, Myriam Labopin, Audrey Mailhol, Gerard Socié, Charles Craddock, Mahmoud Aljurf, Dietrich Beelen, Jan J. Cornelissen, Jean-Henri Bourhis, Hélène Labussière-Wallet, Didier Blaise, Tobias Gedde-Dahl, Maria Gilleece, Ibrahim Yakoub-Agha, Ghulam Mufti, Jordi Esteve, Mohamad Mohty, and Arnon Nagler

Disclosures: none

Contributions: KH was the initiator of the study and wrote the manuscript with equal contribution of ML who did the statistical analysis, JE who revised the manuscript and AN who supervised the study.
