# Supplementary material for: Allogeneic stem cell transplantation in second complete remission for core binding factor acute myeloid leukemia: a study from the Acute Leukemia Working Party of the European Society for Blood and Marrow Transplantation
Source: PubMed Central journal article supplement — Haematologica. 2019 Aug 22;105(6):1723–30. doi: 10.3324/haematol.2019.222810 (PMC7271580; doi:10.3324/haematol.2019.222810), 2020-06
Supplement: HAEMATOL-2019-222810v3-Halaburda-01.pdf [file HAEMATOL-2019-222810v3-Halaburda-01.pdf]

# A retrospective analysis of hematopoietic stem cell transplantation in core binding factor-acute myeloid leukemia (CBF-AML) in second hematological complete remission

 Retrospective study

 Data from the European Society for Blood and Marrow Transplantation (EBMT) Registry between 2000-2014

 181 transplant centers

 631 patients with *de novo* core binding factor-acute myeloid leukemia (CBF-AML)

 265 with t(8;21)

 366 with inv(16)

- undergoing hematopoietic stem cell transplantation (HSCT) in second hematological complete remission
- received bone marrow or peripheral blood transplantation from matched sibling or unrelated donors

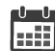

Median follow-up 59.6 (0.9 - 201) months

## Primary endpoint

|                                | 2 years | 95% CI      | 5 years | 95% CI    |  t(8;21) |  inv(16) | <i>p</i> |
|--------------------------------|---------|-------------|---------|-----------|---------------------------------------------------------------------------------------------|---------------------------------------------------------------------------------------------|----------|
| • Leukemia-free survival (LFS) | 59.1%   | 55.2 - 63.1 | 54.1%   | 50 - 58.2 | 52.5%                                                                                       | 63.8%                                                                                       | 0.003    |

## Secondary endpoints

|                                                                    |       |             |       |             |       |       |        |
|--------------------------------------------------------------------|-------|-------------|-------|-------------|-------|-------|--------|
| • Overall survival (OS)                                            | 65%   | 61.2 - 68.9 | 58.2% | 54.1 - 62.3 | 57%   | 70.5% | 0.0003 |
| • Relapse incidence (RI)                                           | 19.8% | 16.7 - 23.1 | 22.5% | 19.2 - 26   | 25.8% | 15.6% | 0.009  |
| • Non-relapse mortality (NRM)                                      | 20.9% | 17.7-24.2   | 23.3% | 19.9-26.8   |       |       |        |
| • Graft-versus-host disease-free and leukemia-free survival (GRFS) | 40.2% | 36.2-44.2   | 34.6% | 30.6-38.6   |       |       |        |
